# Supplementary material for: Contraction of basal filopodia controls periodic feather branching via Notch and FGF signaling
Source: PubMed Central journal article supplement (PMC5890251; doi:10.1038/s41467-018-03801-z), 2018-04-09
Supplement: 41467_2018_3801_MOESM1_ESM.pdf [file 41467_2018_3801_MOESM1_ESM.pdf]

## **Supplementary Information**

Contraction of basal filopodia controls periodic feather branching via  
Notch and FGF signalling

Cheng et al.

## Supplementary Figure 1

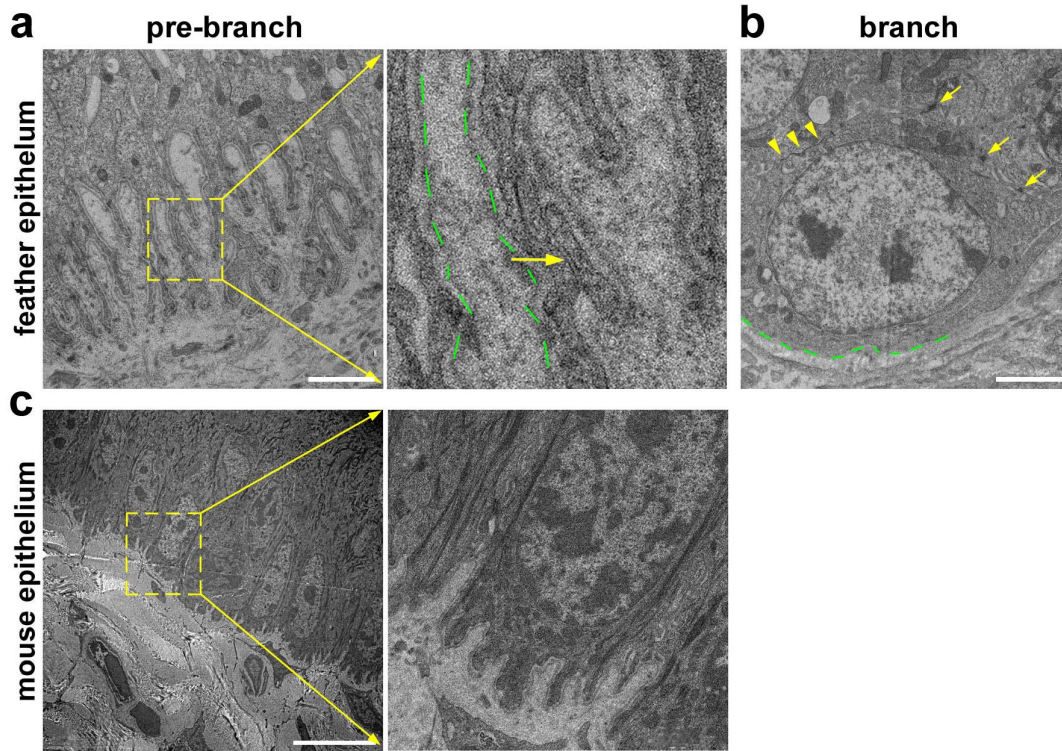

**Supplementary Figure 1 | More TEM images showing the filopodia in basal keratinocytes and cell adhesion in the branched feather epithelium – related to Fig. 2. (a)** Higher magnification view showing two adjacent cells are separated inside a fused filopodium (arrow). **(b)** An outer barb cell connects with its neighbor cells via tight junctions (arrow heads) and desmosomes (yellow arrows). Dashed lines indicate the basal lamina. **(c)** For comparison, basal keratinocytes in the mouse footpad skin also have filopodia but are much shorter. Representative images from five experiments are shown. Bar = 2 $\mu$ m in **a**, **b**, 10 $\mu$ m in **c**.

## Supplementary Figure 2

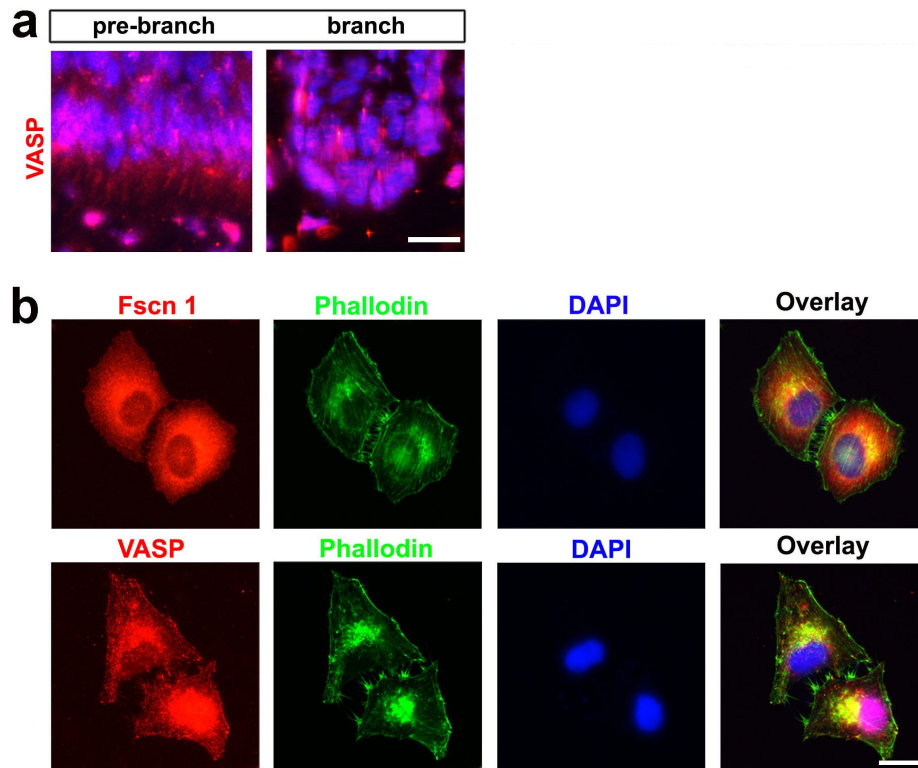

**Supplementary Figure 2 | Additional marker analysis in the feather filopodia and verification of the antibodies – related to Fig. 2.** (a) VASP was localized in the filopodia of basal keratinocytes. (b) Fscn1 and Vasp were localized in the filopodia in HeLa cells. Representative images from three experiments are shown. Bar = 10 $\mu$ m.

### Supplementary Figure 3

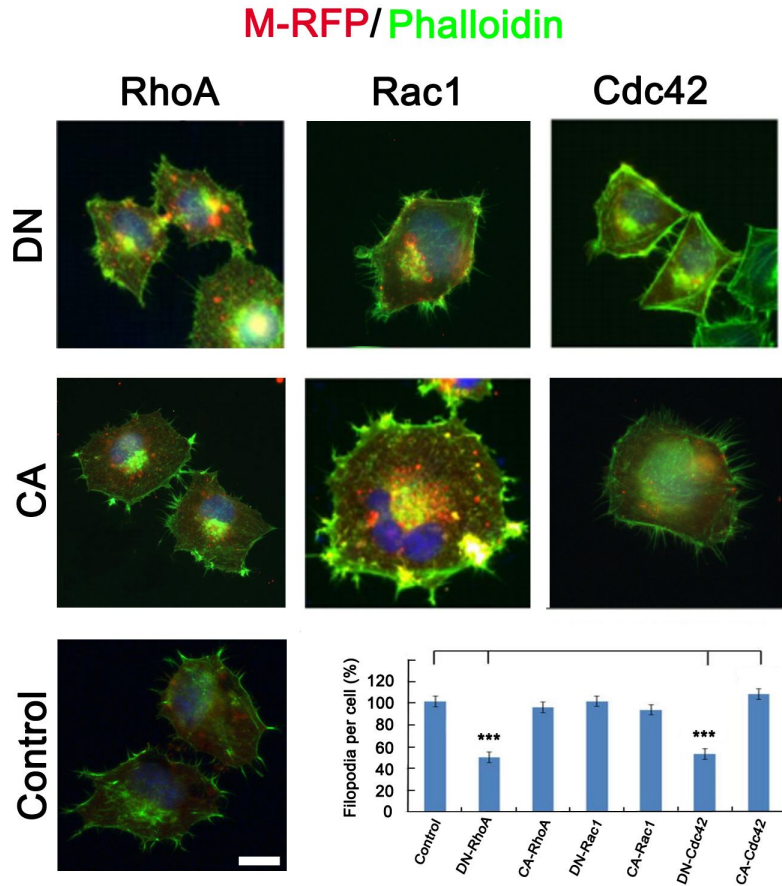

**Supplementary Figure 3 | Rho GTPases regulate filopodia in cell culture.** DN-*RhoA* and DN-*Cdc42* inhibited filopodia formation in HeLa cells. Genes were cloned into the lentiviral vector pLVX-ZsGreen and electroporated into HeLa cells. Cell membrane was shown by co-transfection with a membrane RFP plasmid (M-RFP). Filopodia were stained by FITC-phalloidin and counted for each cell. N=20 cells were counted and representative images are shown. Values are means  $\pm$  s.e.m. \*\*\*,  $p < 0.001$  by  $t$ -test. Bar = 10 $\mu$ m.

## Supplementary Figure 4

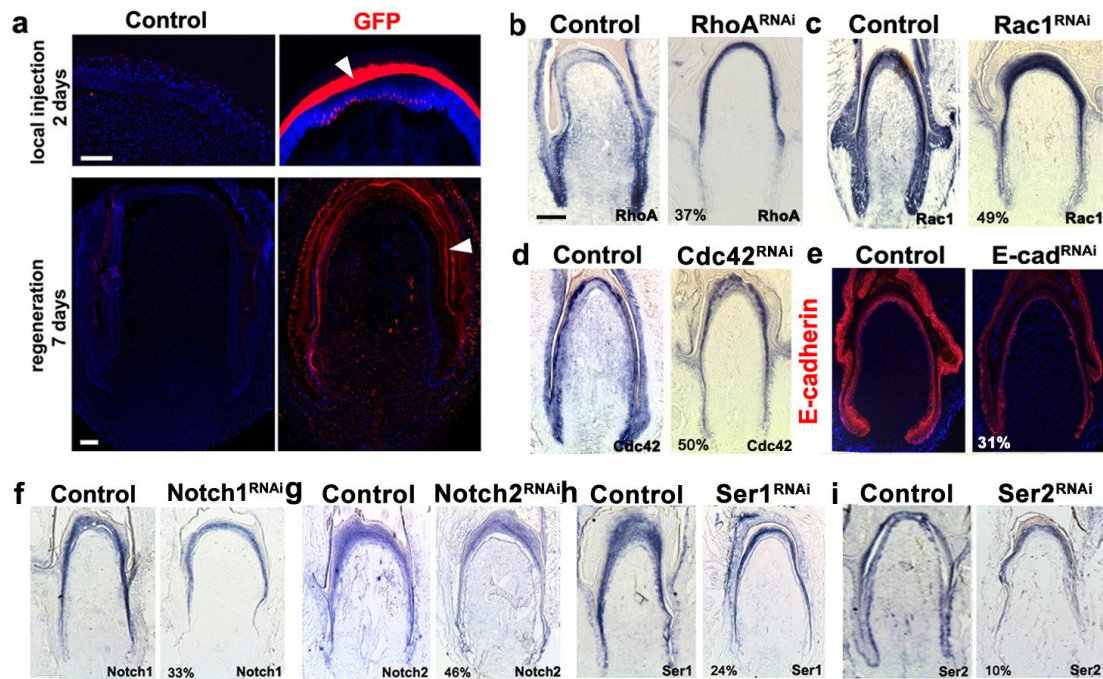

**Supplementary Figure 4 | Validation of virus expression and RNAi knockdown efficiency in the feather follicle.** (a) Virus expression was examined by a GFP antibody, which is carried by the viral vector under a CMV promoter. Both local injection (samples collected 2 days post injection) and feather regeneration (samples collected 7 days post injection) were examined. Arrowheads indicated the keratinized feather sheath which showed background fluorescence. (b-d & f-i) In situ hybridization, and (e) E-Cadherin antibody staining (red) showing lentiviral-mediated RNAi knockdown in the feather follicle. Feathers were regenerated for 4 days before sample collection. Some background signal was found in the keratinized feather sheath. The numbers indicated the relative expression levels as compared with control follicles (quantified by qRT-PCR). Representative images from three repeats are shown. Bar = 100 $\mu$ m.

## Supplementary Figure 5

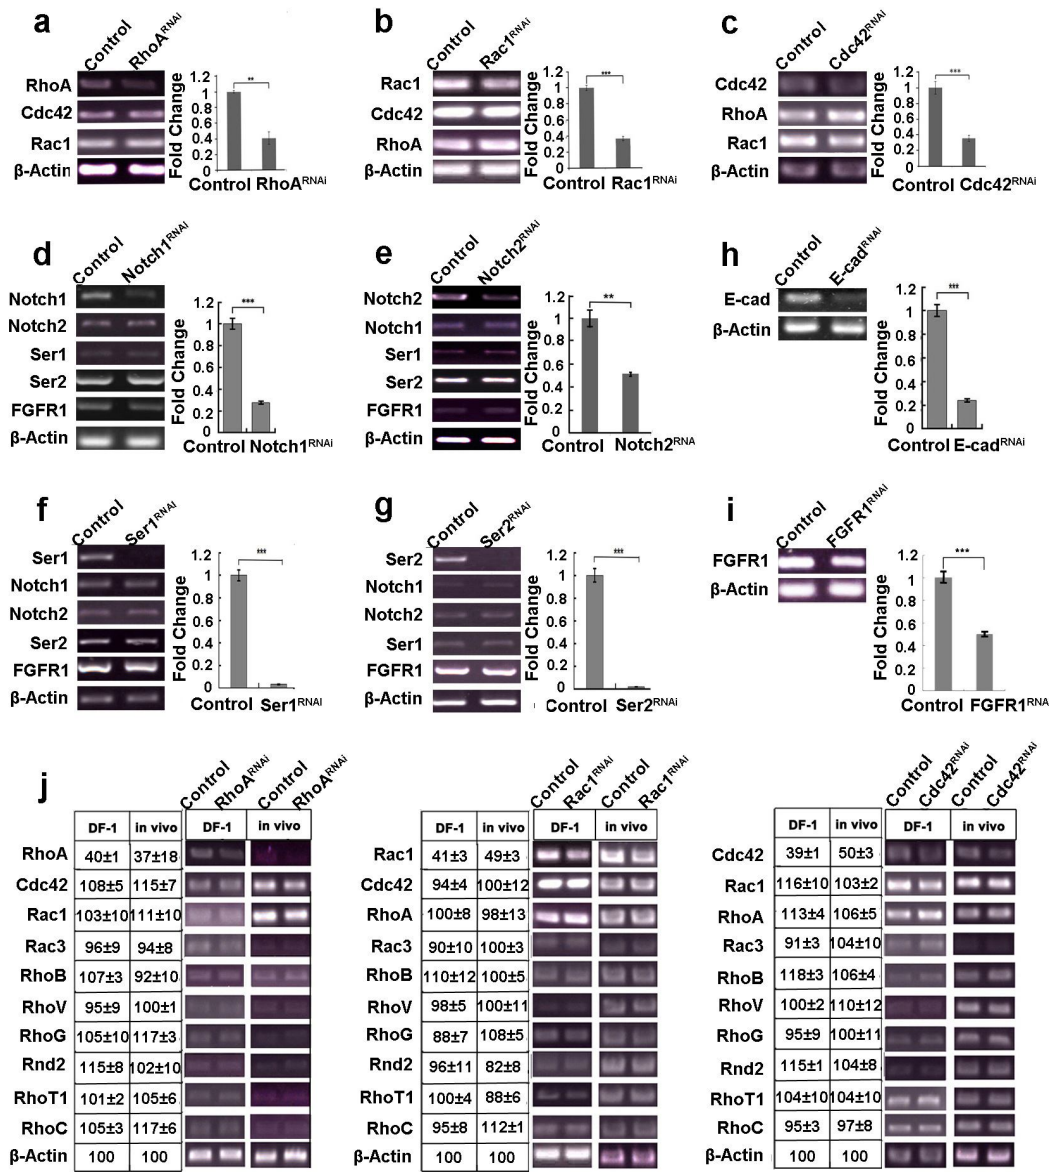

**Supplementary Figure 5 | Specificity and efficiency of RNAi knockdown.** (a-i) RNAi constructs were electroporated into DF-1 cells. A scramble control was used. Cells were lysed 48 hours post electroporation, and total RNAs were extracted. RT-PCR and qRT-PCR were performed. (j) Specificity of RNAi knockdown. Feather follicles were collected individually at 4 days post-infection for RNA extraction and quantification. Results from *in vivo* experiments were compared with those from DF-1 cells (percentage value of control). Values are means ± s.e.m. from three independent experiments. \*,  $p < 0.1$ ; \*\*,  $p < 0.01$ ; \*\*\*,  $p < 0.001$  by *t*-test.

## Supplementary Figure 6

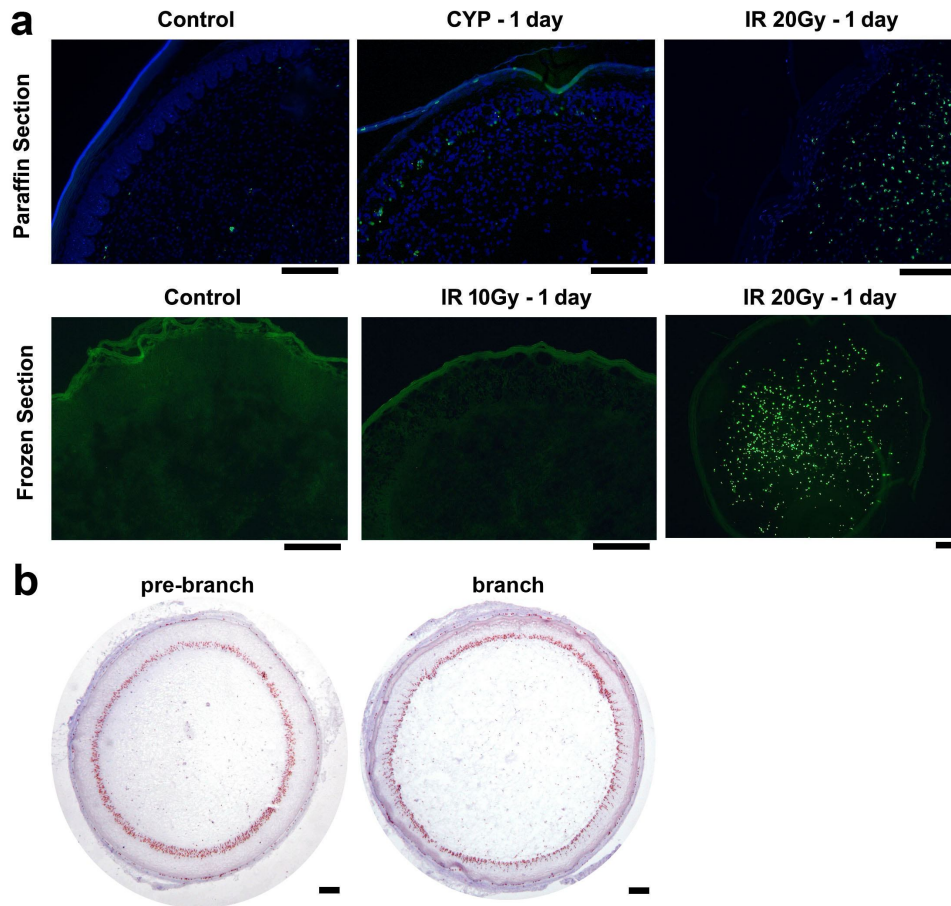

**Supplementary Figure 6 | Lack of pre-patterned cell proliferation or apoptosis during feather branching.** (a) TUNEL analysis was performed on feather samples treated by various methods. Normal feathers don't show positive TUNEL signal before or immediately after branching. For positive controls, treatment by the chemotherapeutic agent cyclophosphamide (CYP, 150 mg kg<sup>-1</sup>) or ionizing radiation (IR) induced extensive TUNEL positive cells in the feather follicle, as demonstrated previously<sup>1, 2</sup>. (b) BrdU staining showed no pre-patterned cell proliferation in feather branching. BrdU (100mg kg<sup>-1</sup> in PBS) was i.p. injected 2 hours before sample collection. Bar = 100µm.

Supplementary Figure 7

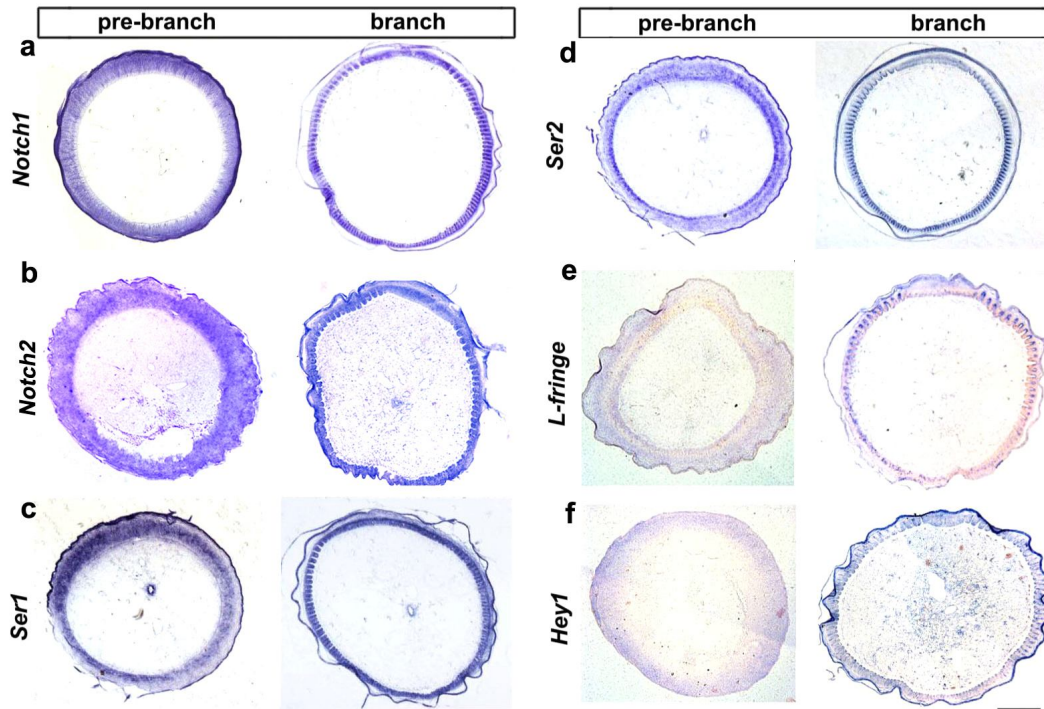

**Supplementary Figure 7 | Additional gene expression analysis in the feather follicle – related to Fig. 5.** In situ hybridization was performed in cross sections before and after branching to show the gene expression patterns. **(a)** *Notch1*; **(b)** *Notch2*; **(c)** *Serrate1*; **(d)** *Serrate2*; **(e)** *L-fringe*; **(f)** *Hey1*. In the anterior-posterior axis, there is no graded expression of Notch signalling components (*Notch1*, *Notch2*, *Ser1*, *Ser2*). *L-fringe* and *Hey1* showed a *de novo* expression pattern in the marginal plate during feather branching. Anterior is where the rachis locates. Bar = 200 $\mu$ m.



Supplementary Figure 8

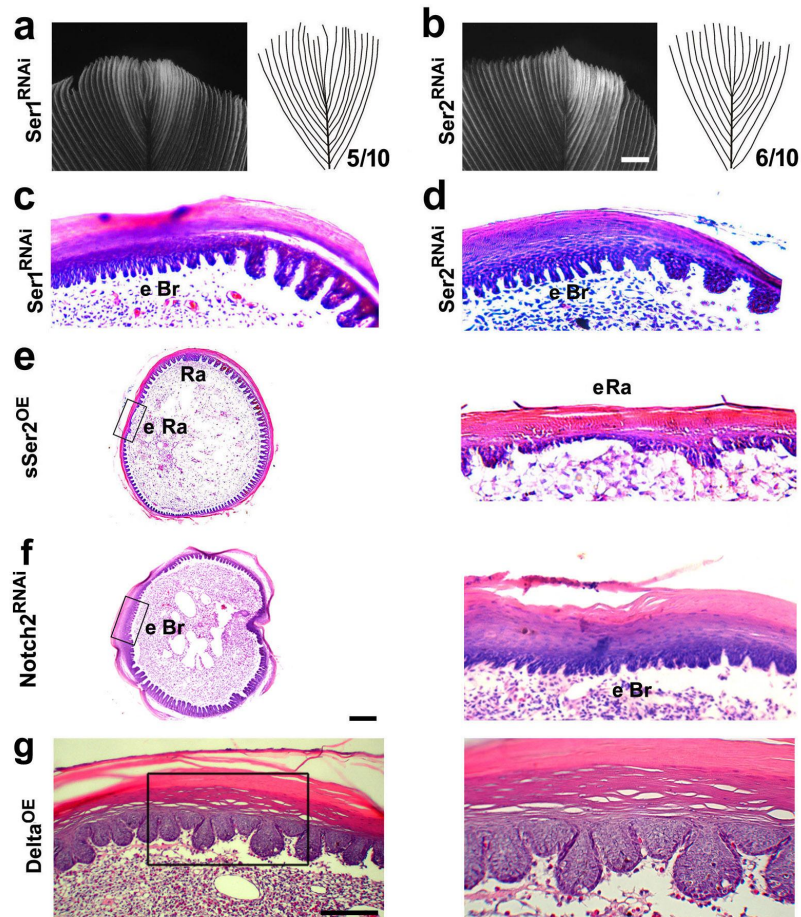

**Supplementary Figure 8 | Additional phenotype analysis – related to Fig. 5.** (a,b) RNAi-*Ser1/2* reduced feather rachis formation. (c-f) Local injection of lentivirus carrying the transgenes. RNAi-*Ser1/2* and *Notch2* induced ectopic branching in the rachis (Ra), whereas a secretory form of *Ser2* induced ectopic rachis (eRa). OE, overexpression. (g) RCAS-mediated *Delta* overexpression induced irregular branching in the feather follicle. The boxed areas in e,f,g are enlarged. Each experiment was repeated at least five times. Bar = 100µm.

## Supplementary Figure 9

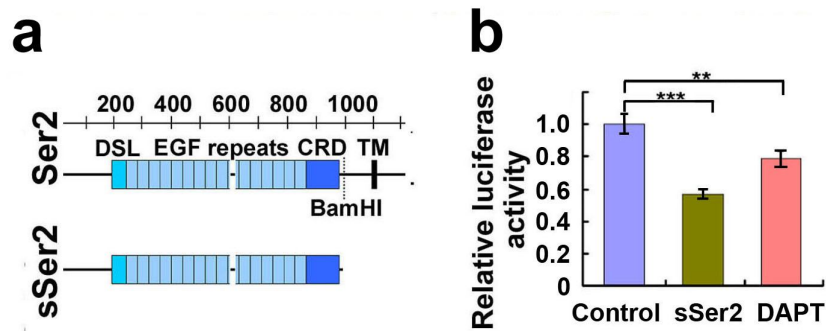

**Supplementary Figure 9 | Construction of a secretory form of Serrate2.** (a) Full-length human *SERRATE2* gene contains a BamHI site before the transmembrane domain, which was used to construct the secretory form of Serrate2 (sSer2). (b) Over expression of sSer2 inhibited the activity of a 6XCSL Notch reporter in 293T cells. The lentiviral vector pLL3.7 was used as control, and the Notch inhibitor DAPT was used as a positive control. sSer2 (300ng/1 $\mu$ g total plasmids per each well in 24-well plate transfection) inhibited Notch reporter activity more effectively than DAPT (46 $\mu$ M) under the experimental condition. Each experimental condition was repeated three times. \*\*,  $p < 0.01$ ; \*\*\*,  $p < 0.001$  by *t*-test.

Supplementary Figure 10

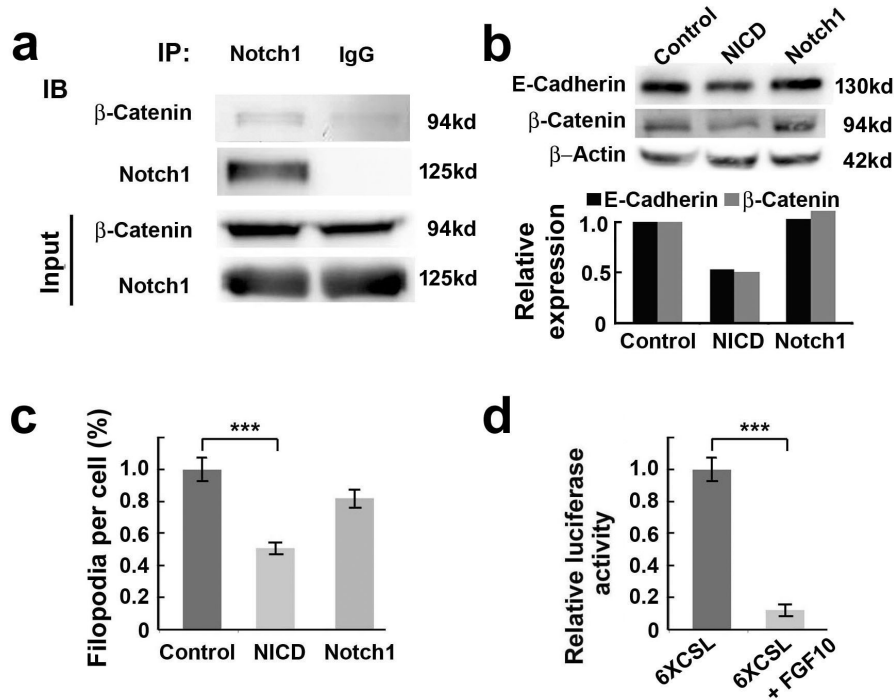

**Supplementary Figure 10 | Notch activation impacts several aspects of cell behaviour in vitro.** (a) β-Catenin co-immunoprecipitated with Notch1 (myc-tagged) in 293T cells. Normal rabbit IgG was used as a control for the immunoprecipitation. (b) Activation of Notch signaling reduced the expression of E-Cadherin and β-Catenin. MCF7 cells were electroporated with the control vector (pEGFP-N1), *NICD* or the full-length *Notch1* expression plasmids, and lysed for Western blot analysis. The original gel images are in Supplementary Fig. 12. (c) Notch activation reduced the filopodia count in HeLa cells (N=20). (d) FGF10 inhibited Notch activation in 293T cells, as measured by the 6XCSL reporter assay. *FGF10* was transfected at 400ng/1μg total plasmids per each well in 24-well plate. Each experiment was repeated three times and representative results are shown. \*\*\*,  $p < 0.001$  by *t*-test.

Supplementary Figure 11

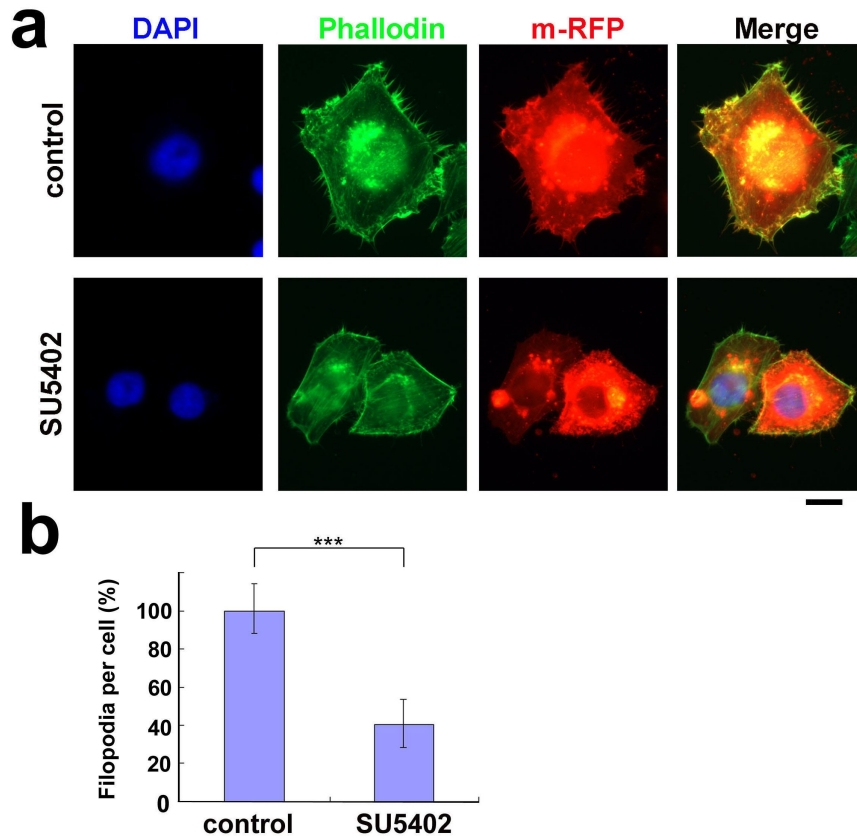

**Supplementary Figure 11 | FGF signaling regulates filopodia in cell culture.** (a) HeLa cells were transfected with membrane-RFP (m-RFP), treated with SU5402 (18 $\mu$ M 2 hours), fixed in 4% PFA, and stained with FITC-Phalloidin (1 $\mu$ g/ml). Representative images of 20 cells are shown. Bar = 10 $\mu$ m. (b) SU5402 treatment reduced the filopodia count. N=20; \*\*\*,  $p < 0.001$  by *t*-test.

## Supplementary Figure 12

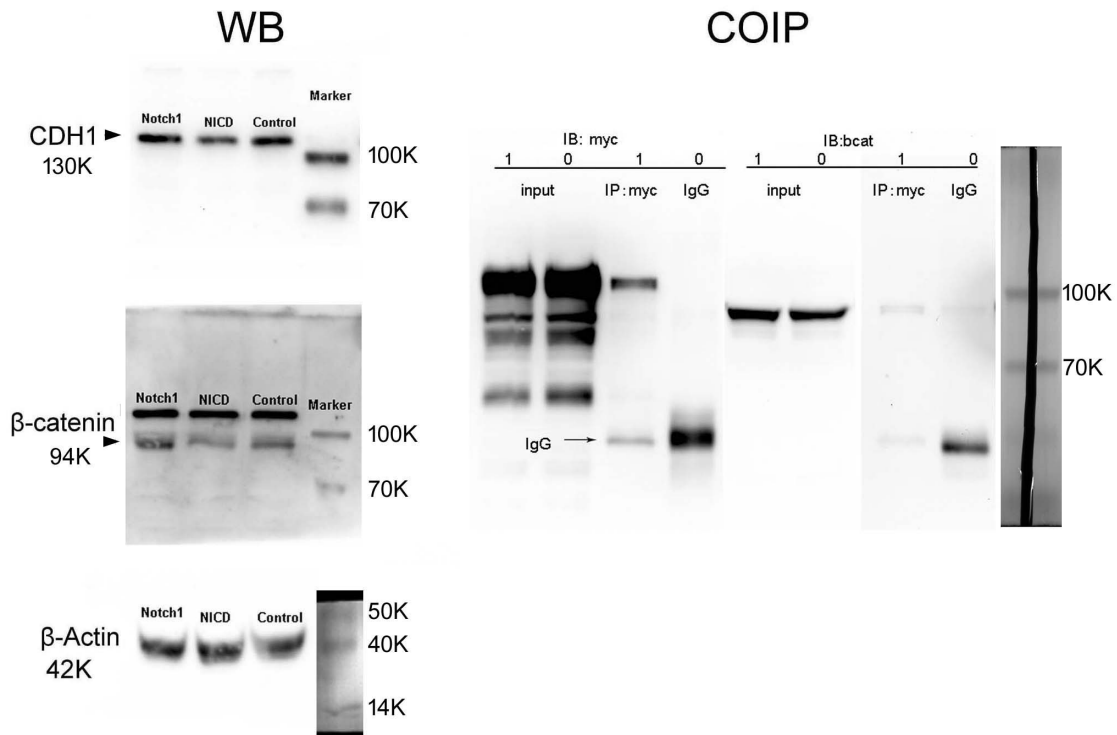

**Supplementary Figure 12 | Uncropped gel images.** For Western blot analysis, the blot was cut along the 50kd line. The upper blot was stained for Cdh1, followed by  $\beta$ -Catenin. The lower blot was stained for  $\beta$ -Actin.

## Supplementary Note 1

Detailed coding information to execute the ACM algorithm is provided below, which is implemented in MATLAB R2012a under the Windows XP system.

```
for k1=1: 1000
    u=NeumannBoundCond(u);    %Initial contour
    K=curvature_central(u);    %Curvature
    DrcU=(epsilon/pi)/(epsilon^2.+u.^2);    %The Dirac function
    [f1, f2] = localBinaryFit(Img, u, KI, KONE, Ksigma, epsilon); %Last two term in Eq.(ii)
    [C1, C2]= binaryfit(Img,u,epsilon);    %First two terms in Eq.(ii)
    s1=lambda1.*f1.^2-lambda2.*f2.^2;
    s2=lambda1.*f1-lambda2.*f2;
    GdataForce=-eta1.*(Img-C1).^2+eta2.*(Img-C2).^2;

    LdataForce=(lambda1-lambda2)*KONE.*Img.*Img+conv2(s1,Ksigma,'same')-2.*Img.*conv2(s
    2,Ksigma,'same');
    G=DrcU.*GdataForce;
    A=-DrcU.*LdataForce;
    P=mu*(4*del2(u)-K);
    L=nu.*DrcU.*K.*g;
    S=DrcU.*g;
    u=u+timestep*(A+P+G+S+L);    %Eq.(iv)
end

function [f1, f2]= localBinaryFit(Img, u, KI, KONE, Ksigma, epsilon)
% compute f1 and f2
Hu= 0.5*(1+ (2/pi)*atan(u./epsilon));
l=Hu.*Img;
c1=conv2(Hu,Ksigma,'same');
c2=conv2(l,Ksigma,'same');
f1=c2./(c1);
f2=(KI-c2)./(KONE-c1);

function [C1,C2]= binaryfit(Img,u,epsilon)
Hu= 0.5*(1+ (2/pi)*atan(u./epsilon));
l=Hu.*Img;
numer_1=sum(l(:));
denom_1=sum(Hu(:));
C1= numer_1/denom_1;
l2=(1-Hu).*Img;
numer_2=sum(l2(:));
```

```
l3=1-Hu;  
denom_2=sum(l3(:));  
C2 = numer_2/denom_2;
```

```
function g = NeumannBoundCond(f)  
% Neumann boundary condition  
[nrow,ncol] = size(f);  
g = f;  
g([1 nrow],[1 ncol]) = g([3 nrow-2],[3 ncol-2]);  
g([1 nrow],2:end-1) = g([3 nrow-2],2:end-1);  
g(2:end-1,[1 ncol]) = g(2:end-1,[3 ncol-2]);
```

```
function k = curvature_central(u)  
% compute curvature  
[ux,uy] = gradient(u);  
normDu = sqrt(ux.^2+uy.^2+1e-10);  
Nx = ux./normDu;  
Ny = uy./normDu;  
[nxx,junk] = gradient(Nx);  
[junk,nyy] = gradient(Ny);  
k = nxx+nyy;
```

**Supplementary Table 1 | Relative expression levels of Rho GTPase family members and Notch pathway genes in the feather follicle.**

| <b>Gene</b>  | <b>FPKM</b> | <b>Gene</b>     | <b>FPKM</b> |
|--------------|-------------|-----------------|-------------|
| <i>Actb</i>  | 1221        | <i>Gapdh</i>    | 1596        |
| <i>RhoA</i>  | 461         | <i>Cdh1</i>     | 125         |
| <i>Cdc42</i> | 190         | <i>Ctnnb1</i>   | 1103        |
| <i>Rac1</i>  | 112         | <i>Notch1</i>   | 11          |
| <i>Rac3</i>  | 68          | <i>Notch2</i>   | 16          |
| <i>RhoB</i>  | 63          | <i>Serrate1</i> | 14          |
| <i>RhoV</i>  | 42          | <i>Serrate2</i> | 59          |
| <i>RhoG</i>  | 28          | <i>L-Fringe</i> | 14          |
| <i>Rnd2</i>  | 18          | <i>R-Fringe</i> | 21          |
| <i>RhoT1</i> | 18          | <i>Hey1</i>     | 22          |
| <i>RhoC</i>  | 10          |                 |             |



**Supplementary Table 2 | Primers and target sequences for RNAi.**

| Name         | Gene           | Sequence (5'-3') |                                              | Product size | Location  |
|--------------|----------------|------------------|----------------------------------------------|--------------|-----------|
| qPCR-β-Actin | NM_205518.1    | ss:<br>as:       | CTGACGGACTACCTCATGAA<br>CCTCTCATTGCCAATGGTGA | 210bp        | nt621-830 |
| qPCR-RhoA    | NM_204704.1    | ss:<br>as:       | TGGATGGAAAGCAGGTGGAG<br>AGGCACGTTGGGACAGAAAT | 191bp        | nt143-333 |
| qPCR-Cdc42   | NM_205048.1    | ss:<br>as:       | TGTGGGTGATGGTGCTGTTG<br>GTGGATAGCTGAGGGGTCGT | 197bp        | nt24-220  |
| qPCR-Rac1    | NM_205017.1    | ss:<br>as:       | ATCAAGTGTGTGGTGGTGGG<br>GGTAGGAGAGTGGGCGTAGT | 208bp        | nt10-217  |
| qPCR-Rac3    | NM_205016.1    | ss:<br>as:       | TCCATCACCTACCCCAAG<br>TTTTGCCAGGCTTCTTCACG   | 158bp        | nt405-562 |
| qPCR-RhoB    | NM_204909.1    | ss:<br>as:       | GAACTACGTGGCCGACATCG<br>GACTTCGGGCACCCACTTCT | 190bp        | nt120-309 |
| qPCR-RhoC    | NM_001029849.1 | ss:<br>as:       | ACATCGCCGACATTGAGGTG<br>CTCCGGGGTCCACTTCTCAG | 182bp        | nt125-306 |
| qPCR-RhoV    | XM_426425.4    | ss:<br>as:       | AGGCAGACTTGCGGGATGAT<br>GCTTTGTGCTCAACACCGCT | 196bp        | nt419-614 |
| qPCR-RhoG    | XM_015280950.1 | ss:<br>as:       | TCTGCTACACCACCAACGCC<br>TCTGGGGGTAGGAGAGCGTC | 162bp        | nt62-223  |
| qPCR-Rnd2    | NM_001252123.1 | ss:<br>as:       | GTCCGTCCATTGGCATAACC<br>CCGCAACGTGTTCAAGTCTG | 183bp        | nt211-393 |

|                 |                |            |                                                  |       |              |
|-----------------|----------------|------------|--------------------------------------------------|-------|--------------|
| qPCR-RhoT1      | NM_001006208.1 | ss:<br>as: | CTTAGATGTACAGCGGTGCC<br>CAGCCTTTCATTCCAACAAC     | 174bp | nt1116-1289  |
| qPCR-FGF2       | NM_205433.1    | ss:<br>as: | GCAAACCGCTTTCTGGCTAT<br>GCTTTCTGTCCAGGTCCAGT     | 200bp | nt341-540    |
| qPCR-FGF7       | NM_001012525.1 | ss:<br>as: | AACAAGTCAGGAAGACTCTATGG<br>TGATTAGGATATTGCCAGAGG | 225bp | nt438-662    |
| qPCR-FGF8       | NM_001012767.1 | ss:<br>as: | CGGGGTTCTACATCTGCATG<br>GCGGTTGAAGGGGTAGTTGA     | 290bp | nt311-600    |
| qPCR-FGF10      | NM_204696.1    | ss:<br>as: | GGATACTGACAAATGGTGCC<br>GTCTCCTTGAGGTGATTGT      | 230bp | nt251-480    |
| qPCR-FGF12      | NM_204888.1    | ss:<br>as: | AGCGTGGTTCCTGGGACTCA<br>ATGGAGGGAGGGAGGGTGTTT    | 246bp | nt559-804    |
| qPCR-FGFR1      | NM_205510.1    | ss:<br>as: | CTGGACCTATCCCGAGAAGA<br>CCCGTATTTGTTCTCCACGA     | 250bp | nt511-760    |
| qPCR-Notch1     | NM_001030295.1 | ss:<br>as: | CAACTGCAAGCAGGACGTGAA<br>TGGCAGACAGGTGCAGTCGTA   | 223bp | nt549--771   |
| qPCR-Notch2     | NM_001252033.1 | ss:<br>as: | CCCTCTCCCCAGTCATTTGT<br>ACTCGGTGGAACATTGGCT      | 480bp | nt6173-6652  |
| qPCR-Serrate1   | XM_415035.5    | ss:<br>as: | CGTGTGACTTGCGCAGAACATT<br>TCTTTGTACAGAGCTGACCAC  | 338bp | nt694--1031  |
| qPCR-Serrate2   | XM_004936419.2 | ss:<br>as: | GATCGTCATCCCGTTCCAGT<br>ATCCAACCTTCCATGCAGGCT    | 321bp | nt576--896   |
| qPCR-E-cadherin | NM_001039258.2 | ss:<br>as: | GGACTGTTGAGATAAGGGGC<br>ACTCACACACCTGGGCTTTG     | 144bp | nt2031--2174 |
| Probe-Notch1    | NM_001030295.1 | ss:<br>as: | CAACTGCAAGCAGGACGTGAA<br>TGGCAGACAGGTGCAGTCGTA   | 223bp | nt549--771   |
| Probe-Notch2    | NM_001252033.1 | ss:<br>as: | CCCTCTCCCCAGTCATTTGT<br>ACTCGGTGGAACATTGGCT      | 480bp | nt6173-6652  |

|                 |                |            |                                                  |       |             |
|-----------------|----------------|------------|--------------------------------------------------|-------|-------------|
| Probe-Serrate1  | XM_415035.5    | ss:<br>as: | CCTTGCAGCTTCGGATCCAAAT<br>TGGGTTCCACAGTAGTTCA    | 638bp | nt415-1052  |
| Probe-Serrate2  | XM_004936419.2 | ss:<br>as: | GGAGATACATTCCGCTGTTCG<br>AGAGGTTTCAGAGGCACTGCAT  | 671bp | nt2278-2948 |
| Probe-L-fringe  | NM_204948.1    | ss:<br>as: | CCAAGAAGTTCCACAAAGCG<br>TGCAATACCACAGCAACGAG     | 896bp | nt385-1280  |
| Probe-Hey1      | XM_015282862.1 | ss:<br>as: | GCAACGCCTTTGGACATC<br>GCAGGCTTCCCCACCCCTTA       | 408bp | nt749-1156  |
| Probe-RhoA      | NM_204704.1    | ss:<br>as: | AGTGAGGGTTCTGTGGTTTC<br>AACAGCAAGAAGTTCACAGG     | 509bp | nt1153-1661 |
| Probe-Rac1      | NM_205017.1    | ss:<br>as: | CTTTTCCCTTGTGAGTCCTG<br>ATGTGATGCTCCATTGTTCT     | 397bp | nt261-657   |
| Probe-Cdc42     | NM_205048.1    | ss:<br>as: | CCCTTCTGCAAAGCTGGTGT<br>AGCACCAGCCTGGGACATCT     | 484bp | nt830-1313  |
| Probe-FGF2      | NM_205433.1    | ss:<br>as: | GCACTTCAAGGACCCCAAG<br>GCTTTCTGTCCAGGTCCAGT      | 363bp | nt178-540   |
| Probe-FGF10     | NM_204696.1    | ss:<br>as: | CAATGTGCAAATGGATACTGAC<br>TCTATGACATTACTACCATTGG | 642bp | nt239-880   |
| RNAi-Notch1     | NM_001030295.1 |            | GATTCGCAGCTGCTACCCA                              |       | nt7396-7414 |
| RNAi-Notch2     | NM_001252033.1 |            | GCACGCTTCGTTAAGCAAG                              |       | nt6277-6295 |
| RNAi-Serrate1   | XM_415035.5    |            | CTCTACTAATCCCGATCGC                              |       | nt576-594   |
| RNAi-Serrate2   | XM_004936419.2 |            | TACTGAACCGGACGAATAT                              |       | nt1164-1182 |
| RNAi-FGFR1      | NM_205510.1    |            | CTCTACTAATCCCGATCGC                              |       | nt147-164   |
| RNAi-E-cadherin | NM_001039258.  |            | GGGACAACGTCTACAATA                               |       | nt2358-2376 |
| RNAi-RhoA       | NM_204704.1    |            | GACTACGATCGACTTAGAC                              |       | nt241-259   |
| RNAi-Rac1       | NM_205017.1    |            | GAGATAGGTGCAGTGAAAT                              |       | nt460-478   |
| RNAi-Cdc42      | NM_205048.1    |            | GAACTCCTAGGGCTGTTCT                              |       | nt1213-1231 |

## Supplementary references

1. Chen, X. *et al.* Dissecting the molecular mechanism of ionizing radiation-induced tissue damage in the feather follicle. *Plos One* **9**, e89234 (2014).
2. Xie, G. *et al.* Testing chemotherapeutic agents in the feather follicle identifies a selective blockade of cell proliferation and a key role for sonic hedgehog signaling in chemotherapy-induced tissue damage. *J. Invest. Dermatol.* **135**, 690-700 (2015).
